# Supplementary material for: Identification and characterization of circadian clock genes in a native tobacco, Nicotiana attenuata
Source: PubMed Central journal article supplement (PMC3489836; doi:10.1186/1471-2229-12-172), 2012-09-25

**Additional file 4.** Phylogenetic trees of circadian clock genes in several plant species.

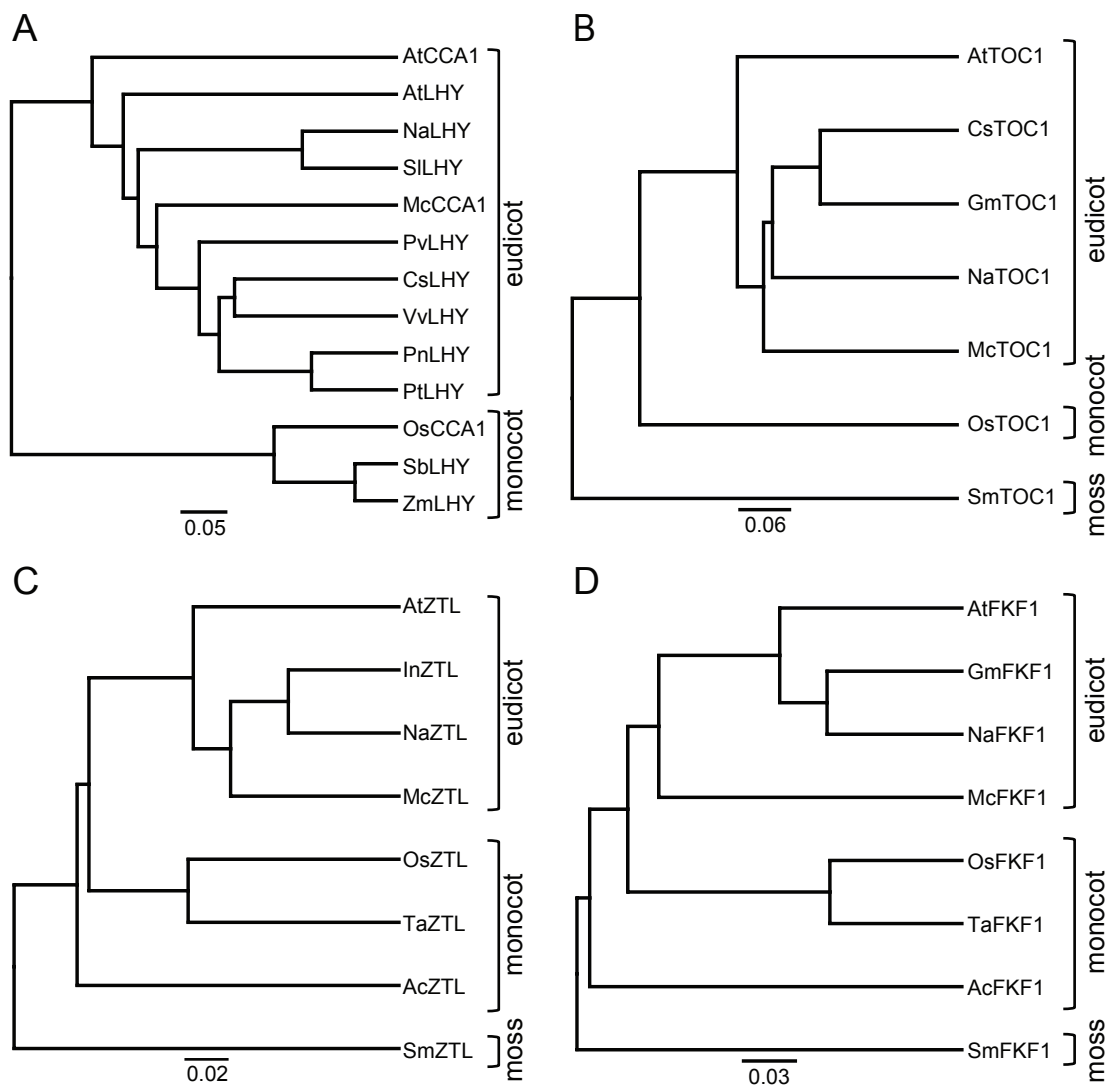

Supplement: 1471-2229-12-172-S4.pdf [file 1471-2229-12-172-S4.pdf]
